# Supplementary material for: MiR-155-mediated loss of C/EBPβ shifts the TGF-β response from growth inhibition to epithelial-mesenchymal transition, invasion and metastasis in breast cancer
Source: PubMed Central journal article supplement (PMC3898103; doi:10.1038/onc.2013.322), 2013-08-19
Supplement: onc2013322x1.pdf [file onc2013322x1.pdf]

**Supplemental Information**

**MiR-155-mediated loss of C/EBP $\beta$  shifts the TGF- $\beta$  response from growth inhibition to epithelial-mesenchymal transition, invasion and metastasis in breast cancer**

Joel Johansson<sup>1,#</sup>, Tove Berg<sup>1,#</sup>, Ewa Kurzejamska<sup>2,4</sup>, Mei-Fong Pang<sup>1</sup>, Vedrana Tabor<sup>1</sup>, Malin Jansson<sup>3</sup>, Pernilla Roswall<sup>1</sup>, Kristian Pietras<sup>1</sup>, Malin Sund<sup>3</sup>, Piotr Religa<sup>2</sup> and Jonas Fuxe<sup>1,§</sup>

**Inventory of Supplemental Information**

**Supplementary Figure 1**

**Supplementary Figure 2**

**Supplementary Figure 3**

**Supplementary Figure 4**

**Supplementary Figure 5**

**Supplementary Material and Methods**

| Tumor# | ER | PR | HER2 |
|--------|----|----|------|
| 1      | 3  | 2  | 3    |
| 2      | 2  | 2  | 2    |
| 3      | 1  | 2  | 0    |
| 4      | 0  | 0  | 2    |
| 5      | 0  | 0  | 2    |
| 6      | 0  | 0  | 0    |
| 7      | 0  | 0  | 0    |
| 8      | 0  | 0  | 0    |

Expression

|   |      |
|---|------|
| 3 | High |
| 2 |      |
| 1 |      |
| 0 | Neg  |

**Supplementary Figure 1.** Table showing characterization of prognostic markers in the 8 human invasive ductal breast cancers that were included in the study, as classified by a pathologist. ER, estrogen receptor; PR, progesterone receptor; HER2, human epidermal growth factor receptor.

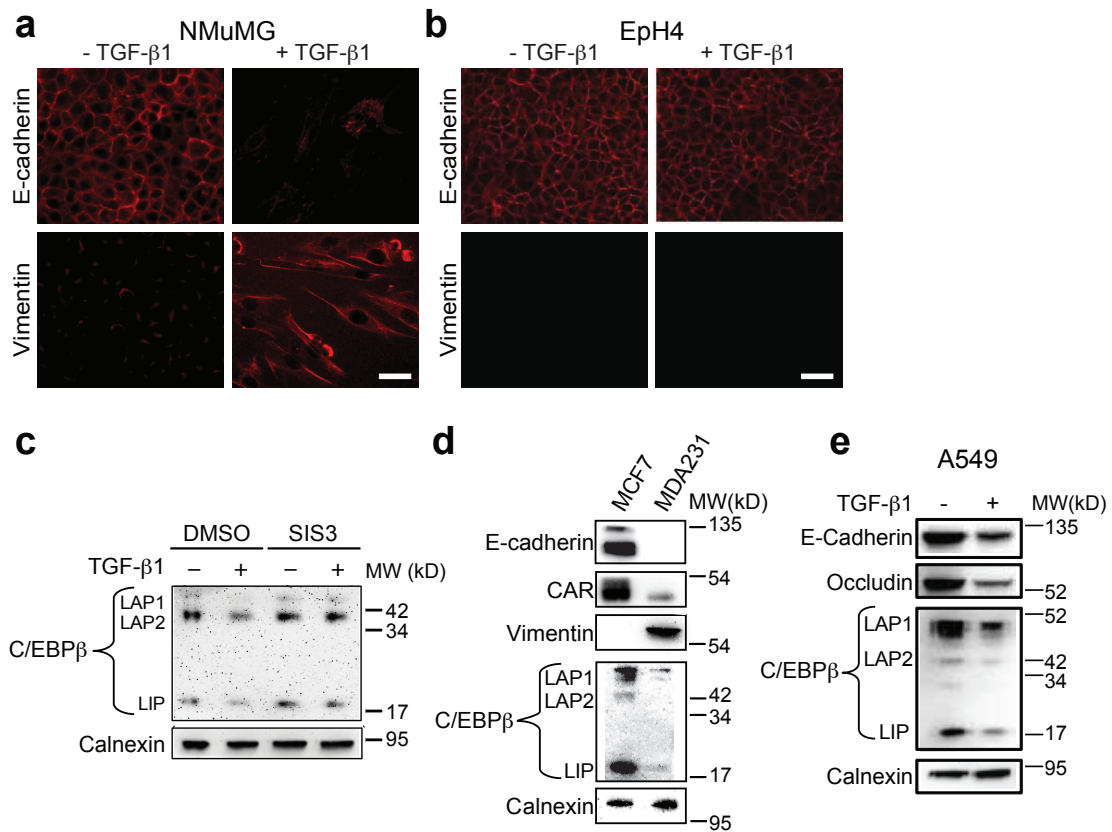

**Supplementary Figure 2.** Loss of C/EBP $\beta$  during EMT. (a, b) Treatment with TGF- $\beta$ 1 (10ng/ml for 48 h) results in the induction of EMT features including loss of E-cadherin, induction of vimentin and cellular elongation in NMuMG cells (a), but not in Eph4 cells (b). (c) Immunoblotting analysis of the effect of a specific inhibitor of Smad3 (SIS3, 10nM) on the repression of C/EBP $\beta$  during TGF- $\beta$ 1-induced EMT (5 ng/ml for 24 h) in NMuMG cells. (d) C/EBP $\beta$  is significantly less expressed in invasive MDA-MB-231 (MDA231) human breast cancer cells, which display EMT features, than in non-invasive MCF-7 human breast cancer cells, which display a more differentiated phenotype. (e) Induction of EMT in human A549 lung carcinoma cells by TGF- $\beta$ 1 (10 ng/ml for 48 h) is associated with loss of C/EBP $\beta$ . Calnexin was used as a loading control for all immunoblotting experiments.

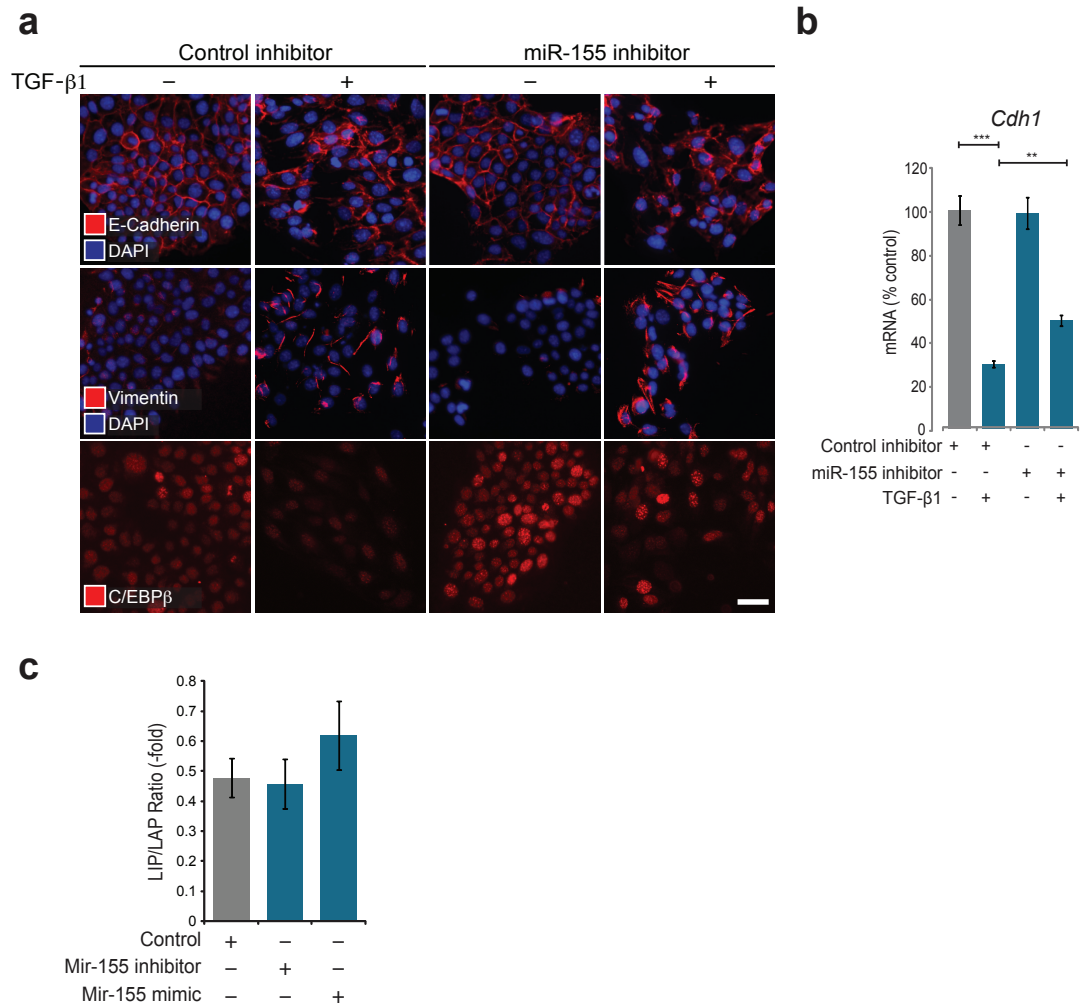

**Supplementary Figure 3.** (a) Immunofluorescence images showing the effect of a miR-155 inhibitor on the expression of E-cadherin, vimentin and C/EBP $\beta$  in NMuMG cells at baseline and after treatment with TGF- $\beta$ 1 (5ng/ml, 24h). (b) Bar graph showing the effect of a miR-155 inhibitor on the expression of Cdh1 mRNA at baseline and after treatment with TGF- $\beta$ 1 (5ng/ml, 24h). (c) Bar graph showing the effects of a miR-155 inhibitor and a miR-155 mimic (each one was used at a concentration of 50 nM and analysis was performed after 72 h) on the ratio between the LIP and LAP isoforms of C/EBP $\beta$  in NMuMG cells.

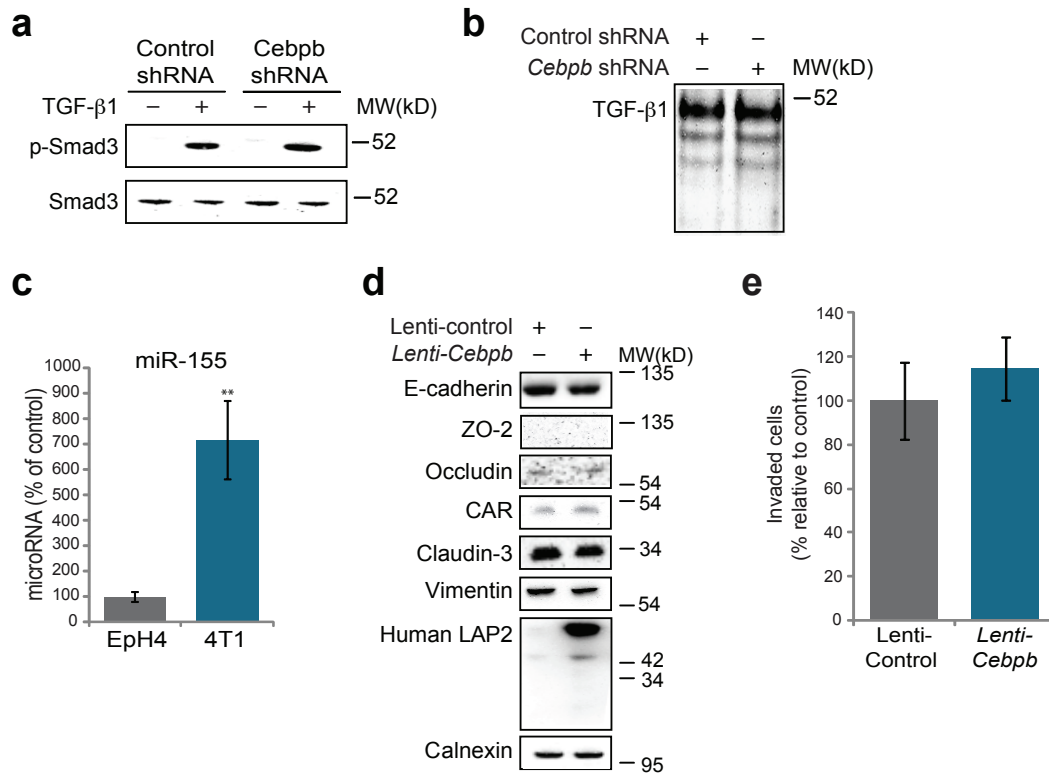

**Supplementary Figure 4.** Effects of manipulating C/EBP $\beta$  levels in 4T1 mammary tumor cells. **(a, b)** Results from immunoblotting analyses showing that C/EBP $\beta$  knockdown does not affect the TGF- $\beta$ 1 effect on Smad3 phosphorylation (a, p-Smad3) or on the endogenous expression of TGF- $\beta$ 1 (b). **(c)** Results from Q-PCR analysis showing significantly increased expression levels of miR-155 in 4T1 tumor cells compared to Eph4 cells. **(d)** Immunoblotting results showing that lentivirus-mediated overexpression of C/EBP $\beta$  does not lead to the reversion of EMT in 4T1 tumor cells. **(e)** Bar graph showing that overexpression of C/EBP $\beta$  in 4T1 cells does not have an impact of the capacity of these cells to invade and migrate in invasion assays.

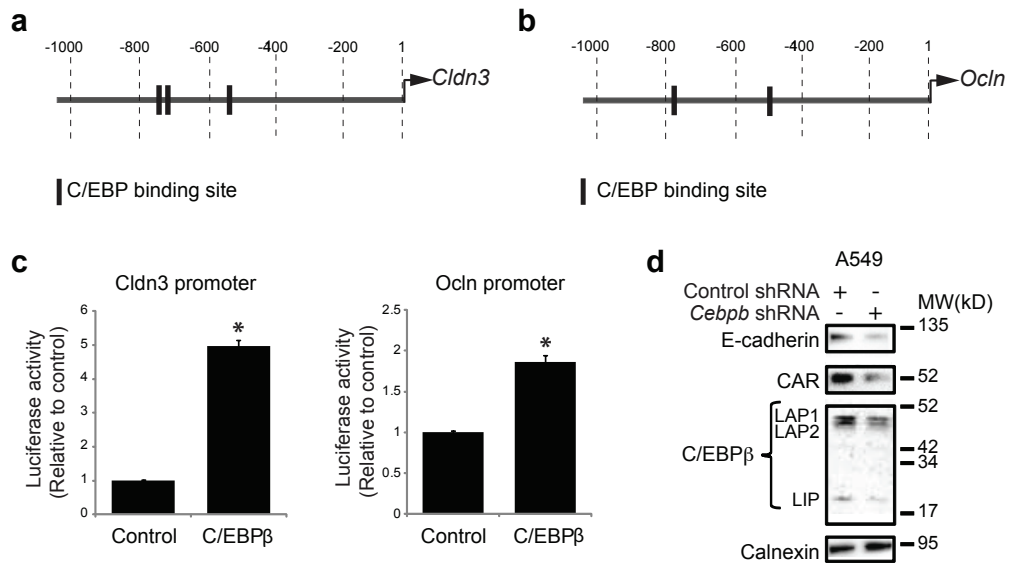

**Supplementary Figure 5.** Role of C/EBP $\beta$  as a transcriptional activator of genes encoding junction proteins. (a, b) Putative C/EBP binding sites were identified via the Consite software (see method section) in gene promoters of both mouse *Cldn3* (a) and *Ocln* (b). (c) Promoter reporter assays showing the capacity of C/EBP $\beta$  to activate expression of the luciferase reporter, which was cloned after the *Cldn3* and *Ocln* promoters in pGL3 vectors that were co-transfected with the C/EBP $\beta$  expression plasmid into EpH4 cells. (d) Immunoblotting results showing the effect of C/EBP $\beta$  knockdown via transient overexpression of *Cebpb* shRNA on the expression of E-cadherin, CAR and C/EBP $\beta$  isoforms in human A549 lung carcinoma cells. Calnexin was used as a loading control.

## Supplementary Material and methods

### Antibodies

The following antibodies were used for immunostaining of cultured cells, and human and mouse tissue specimens: rabbit  $\alpha$ -CAR (1:500) (43), mouse  $\alpha$ -E-cadherin (1:200-1:500; clone 36, BD Biosciences, San Jose, CA), rabbit  $\alpha$ -C/EBP $\beta$  sc-150 (1:100, Santa Cruz Biotechnology, Santa Cruz, CA), mouse  $\alpha$ -Vimentin (1:1000, 3B4, DAKO, Stockholm, Sweden), and N-cadherin (1:100, ab12221, Abcam, Cambridge, UK). Alexa Fluor-conjugated secondary antibodies were used (1:200-1:1000, Jackson ImmunoResearch, Suffolk, UK).

Antibodies used for immunoblotting were rabbit  $\alpha$ -CAR (1:500) (43), mouse  $\alpha$ -E-cadherin (1:1000; clone 36, BD Biosciences, San Jose, CA), rabbit  $\alpha$ -C/EBP $\beta$  sc-150 (1:500, Santa Cruz Biotechnology, Santa Cruz, CA), mouse  $\alpha$ -Vimentin (1:1000, 3B4, DAKO, Stockholm, Sweden) rabbit  $\alpha$ -Calnexin (1:2000) (43), N-cadherin (1:500, ab12221, Abcam, Cambridge, UK), rabbit anti-claudin-3 (1:500; 34-1700, Invitrogen, CA, USA), mouse anti-Snail (supernatant, 1:10, kind gift from Ismo Virtanen, Helsinki University), rabbit anti-Slug (1:500, clone C19G7, Cell signaling), rabbit anti-Zeb1 (1:250, NBP1-05987, Novus Biologicals, Stockholm, Sweden), mouse anti-Twist (1:500, sc-81417, Santa Cruz), rabbit anti-phospho-SMAD3 (1:500, C25A9, Cell signaling, MA, USA), mouse anti-Occludin, 611090, BD Bioscience, CA, USA), and  $\alpha$ -mouse and  $\alpha$ -rabbit Horseradishperoxidase IgG (1:8000, #7074, Cell Signaling Technology, Danvers, MA).

Antibodies used for Chip were Chip 4µg of rabbit  $\alpha$ -C/EBP $\beta$  sc-150 (1:100, Santa Cruz Biotechnology, Santa Cruz, CA), 4µg of Histone H3, (ab1791) and rabbit IgG (ab46540) both from Abcam, Cambridge, UK.

**Supplementary Table 1.** List of primers used.

| Primer name                    | Sequence 5'-3'              | Use                  |
|--------------------------------|-----------------------------|----------------------|
| <i>Cdh1</i> forward:           | GACCGCTAGCCATAGCAAGGCTATGTC | <i>Cdh1</i> promoter |
| <i>Cdh1</i> reverse:           | GACCAAGCTTAGCAAACACTGAGCTCG | <i>Cdh1</i> promoter |
| <i>Cdh1</i>                    | QT00121163*                 | Q-PCR                |
| <i>Cxadr</i>                   | QT00132489*                 | Q-PCR                |
| <i>Gapdh</i>                   | QT00309099*                 | Q-PCR                |
| <i>Rpl19</i>                   | QT01779218*                 | Q-PCR                |
| <i>Vim</i>                     | QT00159670*                 | Q-PCR                |
| <i>Cdh1</i> (147bp) forward II | CCAGAAGTGAGAAGGCTGAG        | Q-PCR                |
| <i>Cdh1</i> (147bp) reverse II | ATGCTGGGATTGCACAAG          | ChIP                 |
| <i>Cdh1</i> (109bp) forward I  | GCAATGCAATCCCAAGAC          | ChIP                 |
| <i>Cdh1</i> (109bp) reverse I  | GATCCTGTGCTCGCAAAC          | ChIP                 |
| <i>Cxadr</i> (136bp) forward I | AACACTGTGGGCTCTTGCTT        | ChIP                 |



|                                 |                     |      |
|---------------------------------|---------------------|------|
| <i>Cxadr</i> (136bp) reverse I  | TCCCAGAGCCTGGTACTC  | ChIP |
| <i>Cxadr</i> (145bp) forward II | TTGTCCCTGTGGGCTAAC  | ChIP |
| <i>Cxadr</i> (145bp) reverse II | ATTGAAGGCTCAGGAGAGG | ChIP |

\*Product number of validated primers obtained from Qiagen
